# Supplementary material
Source: publisher figshare collection journal article supplement (https://acs.figshare.com/ndownloader/files/4647127)
Supplement: Supplementary file 1 [file 4647127]

## Supplementary material

### Self-assembly deposition and electrochemical characterization of multilayered ultrathin films of MnO<sub>2</sub> nanoparticles in a room temperature ionic liquid

*Tânia M. Benedetti, Fernanda F. C. Bazito, Eduardo A. Ponzio, and  
Roberto M Torresi*

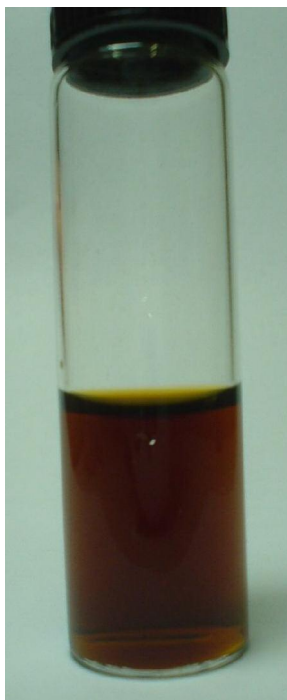

**Figure 1s** - A  $10^{-3} \text{ molL}^{-1}$  aqueous sol of MnO<sub>2</sub> nanoparticles. This photograph was taken in February 2<sup>nd</sup>, 2006.

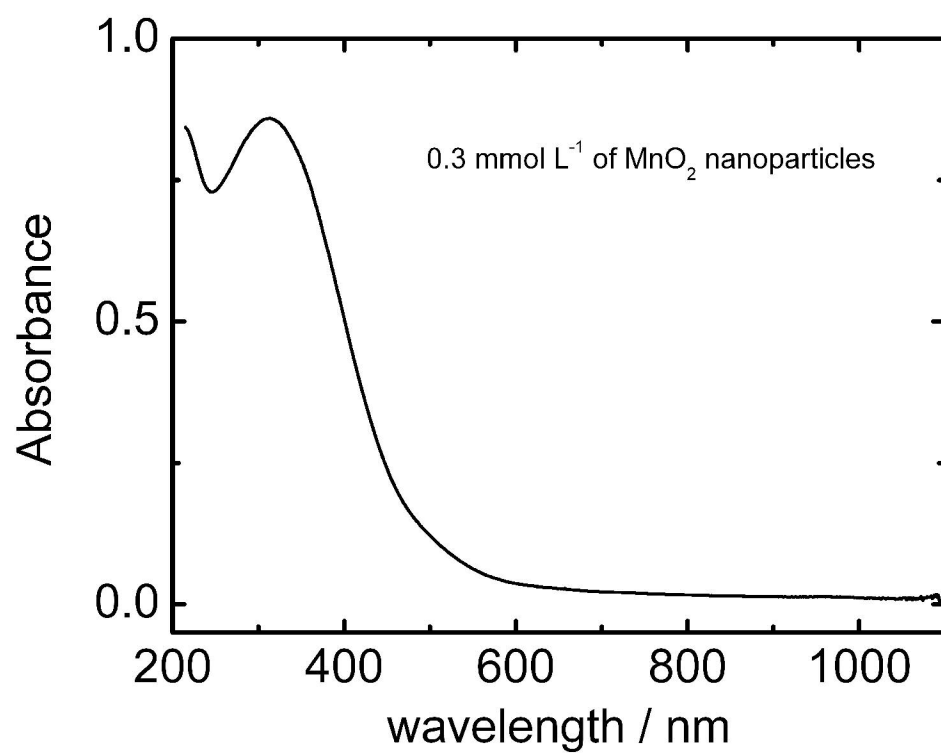

**Figure 2s** – UV-vis spectrum of a 0.3 mmolL<sup>-1</sup> aqueous sol of MnO<sub>2</sub> nanoparticles.

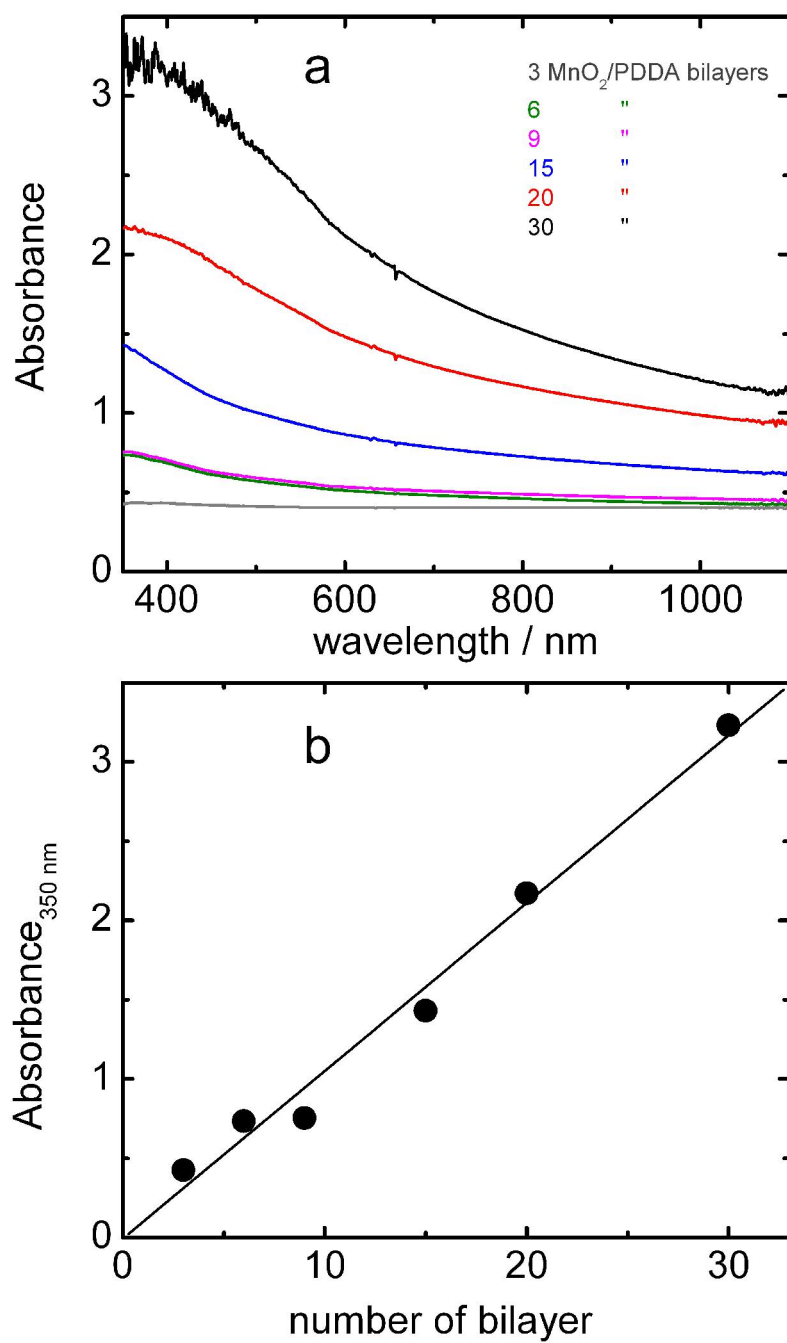

**Figure 3s** – (a) Visible spectra of different number of bilayers (indicated in the figure).  
 (b) Absorbance at 350 nm as a function of the number of bilayers of  $\text{MnO}_2/\text{PDDA}$ .

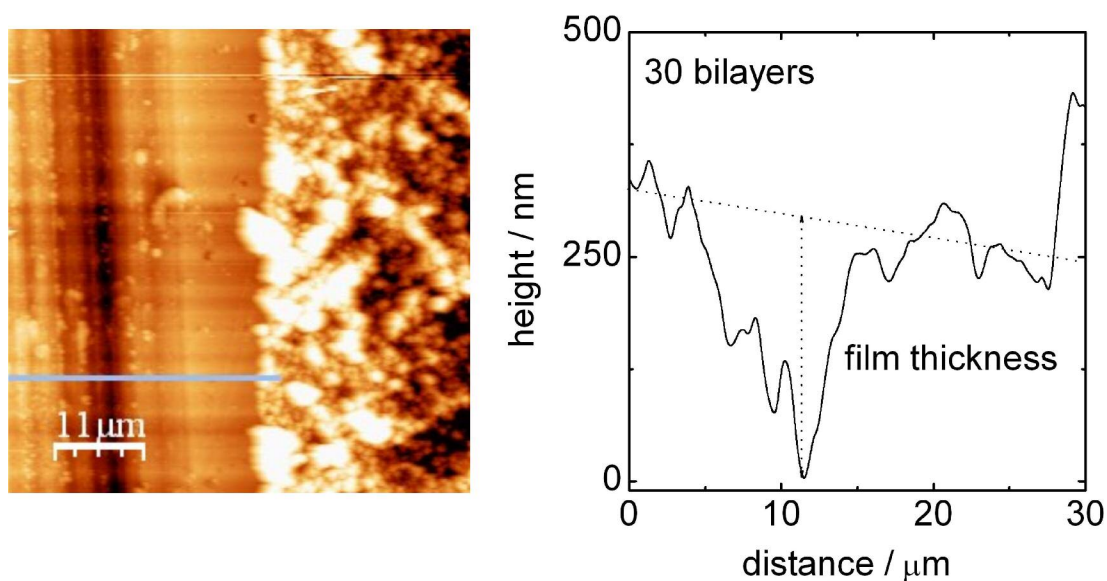

**Figure 4s** – Left: AFM image obtained in the AAC mode of 30 bilayers of MnO<sub>2</sub>/PDDA. Right: Cross section (indicated in the image) on the intentional scratch made on the film to measure its thickness.

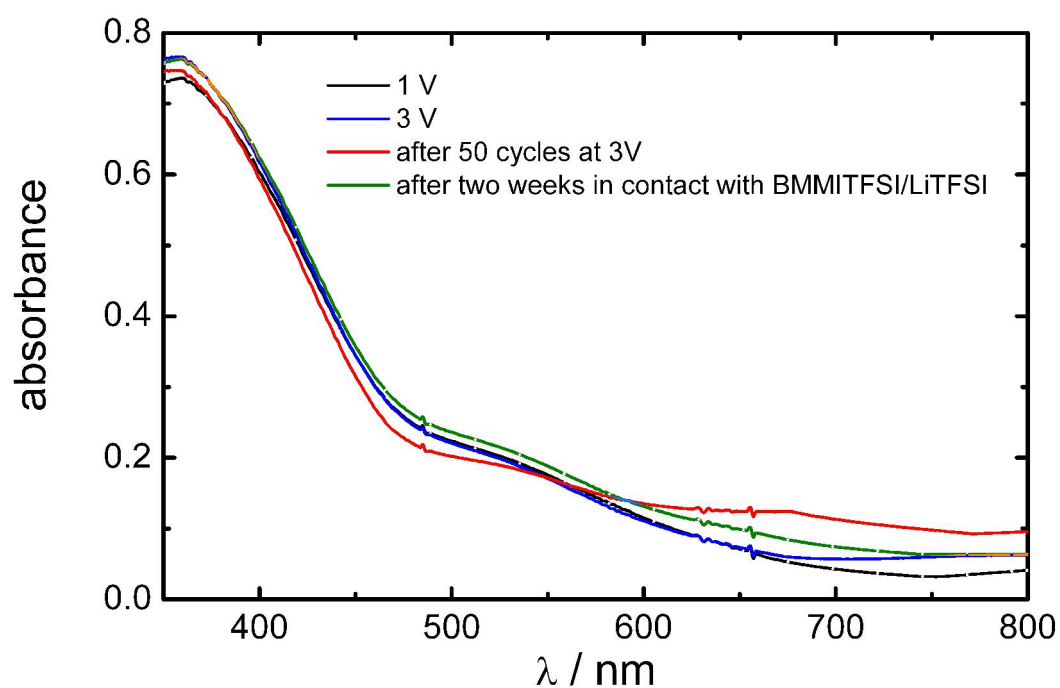

**Figure 5s** – Visible spectra of 10 bilayers of MnO<sub>2</sub>/PDDA at different experimental conditions indicated in the figure.

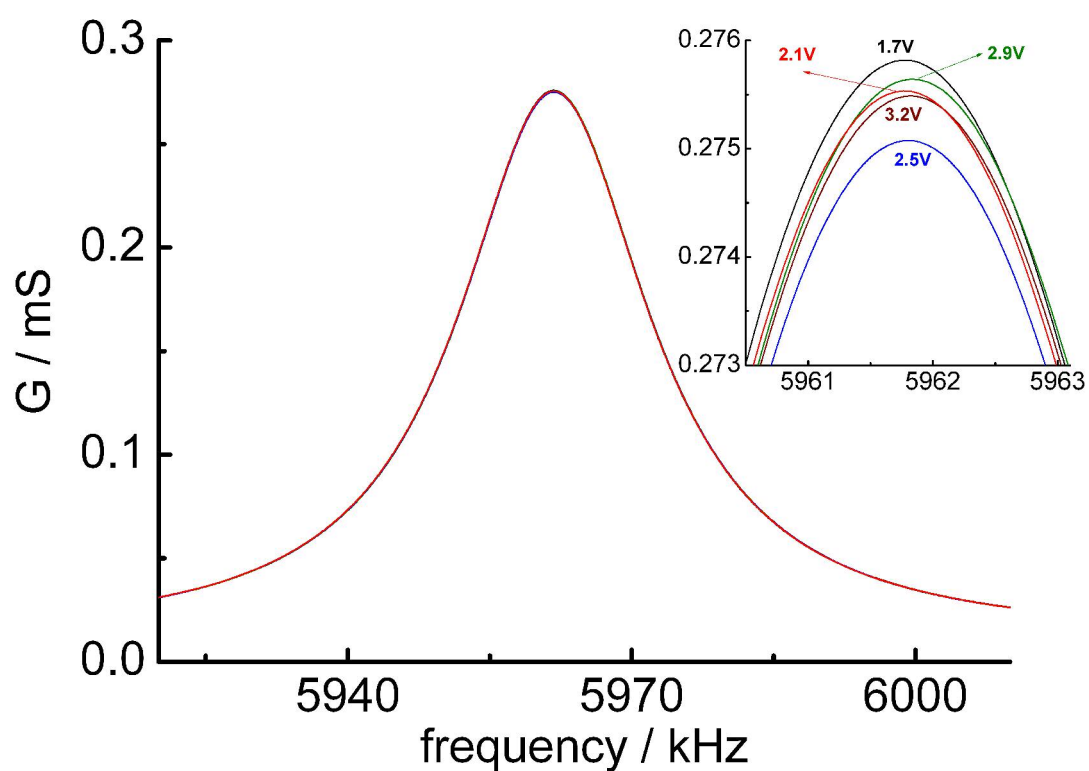

**Figure 6s** – EIA (conductance) spectrum of quartz electrode with 12 MnO<sub>2</sub>/PDDA bilayers at different applied potentials in BMMITFSI + 0.1 molL<sup>-1</sup> LiTFSI electrolytic solution. The inset is an enlarged view of the maximum of G in order to observe the small changes at the different applied potentials (indicate in the figure).

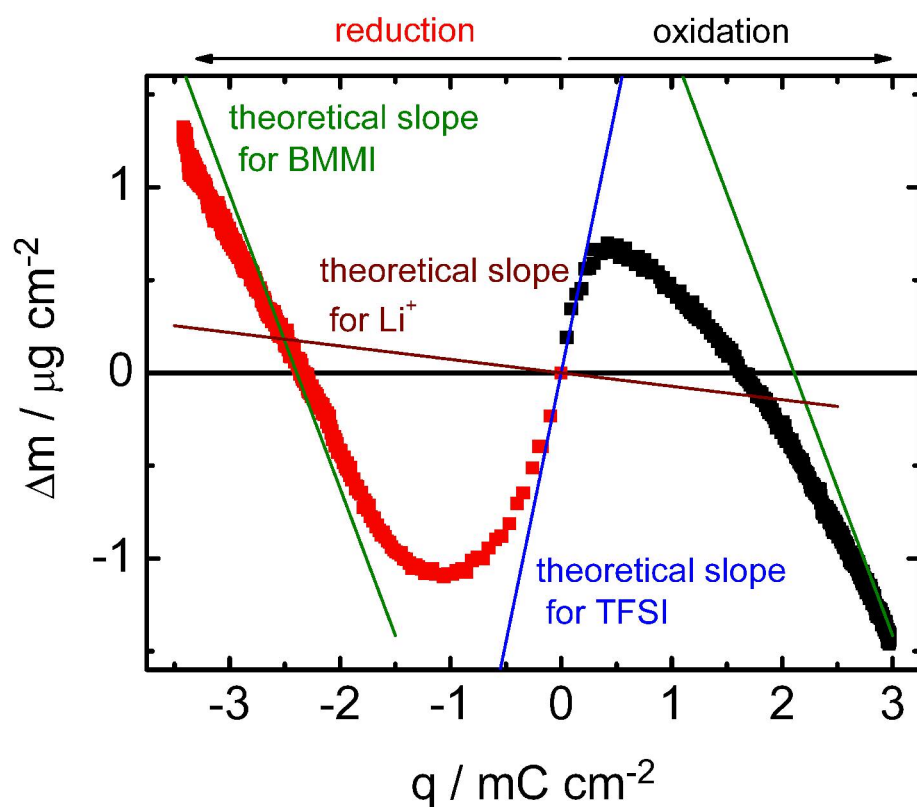

**Figure 7s** – Electric charge as a function of mass change for 12 MnO<sub>2</sub>/PDDA bilayers in BMMITFSI + 0.1 molL<sup>-1</sup> LiTFSI electrolytic solution.
